# Supplementary material
Source: Springer Nature journal article supplement (https://www.springermedizin.de/resource/supplementary/13584_2013_79_MOESM2_ESM.pdf/9676936)

## First-in-life hospitalizations

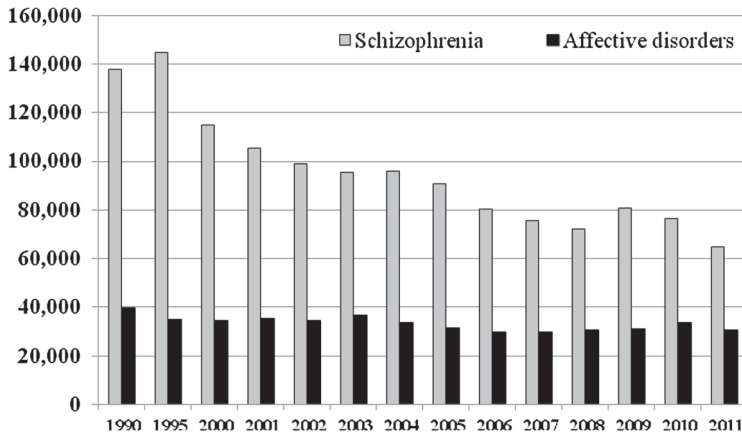

## All hospitalizations

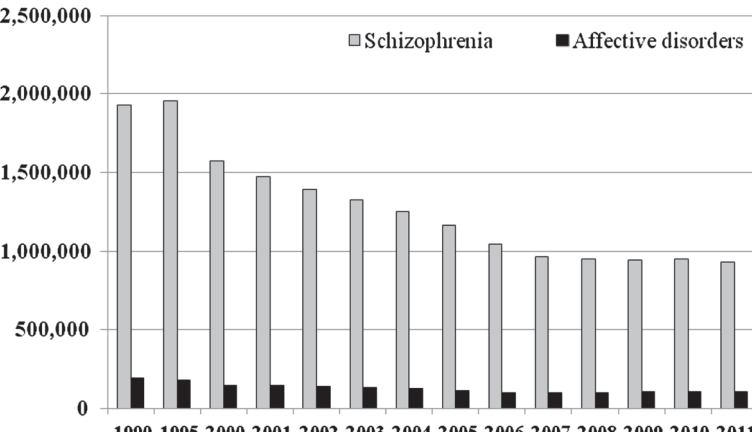

Supplement: MOESM2 [file 9676936]
